# Supplementary material for: A Machine-Learning Classification Tree Model of Perceived Organizational Performance in U.S. Federal Government Health Agencies
Source: MDPI journal article supplement (doi:10.3390/su131810329), 2021-09-16
Supplement: s1 [file s1]

**Table S1.** Predictor Variables Included in the Machine Learning Classification Tree Model (FEVS, 2018).

| Study Measure                            | FEVS Survey Items                                                                   | FEVS Item Responses                                                                                                     |
|------------------------------------------|-------------------------------------------------------------------------------------|-------------------------------------------------------------------------------------------------------------------------|
| <b>Outcome</b>                           |                                                                                     |                                                                                                                         |
| DV. Perceived Organizational Performance | Q39. My agency is successful at accomplishing its mission.                          | 1. Strongly Disagree<br>2. Disagree<br>3. Neither Agree nor Disagree<br>4. Agree<br>5. Strongly Agree<br>X. Do Not Know |
| <b>Predictor variables</b>               |                                                                                     |                                                                                                                         |
| 1. Demographics and Turnover Intention   |                                                                                     |                                                                                                                         |
| Gender                                   | Are you                                                                             | A. Male<br>B. Female                                                                                                    |
| Education attainment                     | What is the highest degree or level of education you have completed?                | A. Less than a Bachelor's Degree<br>B. Bachelor's Degree<br>C. Beyond a Bachelor's Degree                               |
| Minority                                 | Minority status                                                                     | A. Minority<br>B. Non-Minority                                                                                          |
| Supervisory status                       | What is your supervisory status?                                                    | A. Non-Supervisor/Team Leader<br>B. Supervisor/Manager/Senior Leader                                                    |
| Organizational tenure                    | How long have you been with the Federal Government (excluding military service)?    | A. Ten years or fewer<br>B. Between 10 and 20 years<br>C. More than 20 years                                            |
| Turnover intention                       | Are you considering leaving your organization within the next year, and if so, why? | A. No<br>B. Yes. to take another Federal job<br>C. Yes. to take a job outside Federal Government<br>D. Other            |

**Table S1** (Continued)

| Study Measure                           | FEVS survey items                                                                                                                                    |
|-----------------------------------------|------------------------------------------------------------------------------------------------------------------------------------------------------|
| 2. Workplace Environmental Factors      |                                                                                                                                                      |
| IV1. Employee Development               | Q1. I am given a real opportunity to improve my skills in my organization.                                                                           |
| IV2. Enough Information                 | Q2. I have enough information to do my job well.                                                                                                     |
| IV3. Creative Tendency                  | Q3. I feel encouraged to come up with new and better ways of doing things.                                                                           |
| IV4. Intrinsic Motivation               | Q4. My work gives me a feeling of personal accomplishment.                                                                                           |
| IV5. Intrinsic Motivation               | Q5. I like the kind of work I do.                                                                                                                    |
| IV6. Goal Clarity                       | Q6. I know what is expected of me on the job.                                                                                                        |
| IV7. Work Motivation                    | Q7. When needed I am willing to put in the extra effort to get a job done.                                                                           |
| IV8. Creative Tendency                  | Q8. I am constantly looking for ways to do my job better.                                                                                            |
| IV9. Resources                          | Q9. I have sufficient resources (for example, people, materials, budget) to get my job done.                                                         |
| IV10. Reasonable Workload               | Q10. My workload is reasonable.                                                                                                                      |
| IV11. Intrinsic Motivation              | Q11. My talents are used well in the workplace.                                                                                                      |
| IV12. Goal Clarity                      | Q12. I know how my work relates to the agency's goals.                                                                                               |
| IV13. Intrinsic Motivation              | Q13. The work I do is important.                                                                                                                     |
| IV14. Physical Condition                | Q14. Physical conditions (for example, noise level, temperature, lighting, cleanliness in the workplace) allow employees to perform their jobs well. |
| IV15. Organizational Procedural justice | Q15. My performance appraisal is a fair reflection of my performance.                                                                                |
| IV16. Value-added Leadership            | Q16. I am held accountable for achieving results.                                                                                                    |

---

|                                         |                                                                                                                                                                       |
|-----------------------------------------|-----------------------------------------------------------------------------------------------------------------------------------------------------------------------|
| IV17. Organizational Procedural Justice | Q17. I can disclose a suspected violation of any law, rule or regulation without fear of reprisal.                                                                    |
| IV18. Employee Development              | Q18. My training needs are assessed.                                                                                                                                  |
| IV19. Performance Appraisal             | Q19. In my most recent performance appraisal, I understood what I had to do to be rated at different performance levels (for example, Fully Successful, Outstanding). |
| IV20. Collaborative Culture             | Q20. The people I work with cooperate to get the job done.                                                                                                            |
| IV21. Selection and Recruitment         | Q21. My work unit is able to recruit people with the right skills.                                                                                                    |
| IV22. Performance-oriented Culture      | Q22. Promotions in my work unit are based on merit.                                                                                                                   |
| IV23. Performance-oriented Culture      | Q23. In my work unit, steps are taken to deal with a poor performer who cannot or will not improve.                                                                   |
| IV24. Performance-oriented Culture      | Q24. In my work unit, differences in performance are recognized in a meaningful way.                                                                                  |
| IV25. Performance-oriented Culture      | Q25. Awards in my work unit depend on how well employees perform their jobs.                                                                                          |
| IV26. Knowledge Sharing                 | Q26. Employees in my work unit share job knowledge with each other.                                                                                                   |
| IV27. Employee Development              | Q27. The skill level in my work unit has improved in the past year.                                                                                                   |
| IV28. Work-unit Performance             | Q28. How would you rate the overall quality of work done by your work unit?                                                                                           |
| IV29. Employee Development              | Q29. My work unit has the job-relevant knowledge and skills necessary to accomplish organizational goals.                                                             |
| IV30. Employee Empowerment              | Q30. Employees have a feeling of personal empowerment with respect to work processes.                                                                                 |
| IV31. Performance-oriented Culture      | Q31. Employees are recognized for providing high quality products and services.                                                                                       |
| IV32. Rewards for Innovation            | Q32. Creativity and innovation are rewarded.                                                                                                                          |

---

---

|                                         |                                                                                                                                                                                                                                                     |
|-----------------------------------------|-----------------------------------------------------------------------------------------------------------------------------------------------------------------------------------------------------------------------------------------------------|
| IV33. Performance-oriented Culture      | Q33. Pay raises depend on how well employees perform their jobs.                                                                                                                                                                                    |
| IV34. Diversity Management              | Q34. Policies and programs promote diversity in the workplace (for example, recruiting minorities and women, training in awareness of diversity issues, mentoring).                                                                                 |
| IV35. Work Security and Safety          | Q35. Employees are protected from health and safety hazards on the job.                                                                                                                                                                             |
| IV36. Work Security and Safety          | Q36. My organization has prepared employees for potential security threats.                                                                                                                                                                         |
| IV37. Organizational Procedural Justice | Q37. Arbitrary action, personal favoritism and coercion for partisan political purposes are not tolerated.                                                                                                                                          |
| IV38. Organizational Procedural Justice | Q38. Prohibited Personnel Practices (for example, illegally discriminating for or against any employee/applicant, obstructing a person's right to compete for employment, knowingly violating veterans' preference requirements) are not tolerated. |
| IV39. Organizational Commitment         | Q40. I recommend my organization as a good place to work.                                                                                                                                                                                           |
| IV40. Supervisory Support               | Q42. My supervisor supports my need to balance work and other life issues.                                                                                                                                                                          |
| IV41. Employee Development              | Q43. My supervisor provides me with opportunities to demonstrate my leadership skills.                                                                                                                                                              |
| IV42. Leadership Effectiveness          | Q44. Discussions with my supervisor about my performance are worthwhile.                                                                                                                                                                            |
| IV43. Diversity Management              | Q45. My supervisor is committed to a workforce representative of all segments of society.                                                                                                                                                           |
| IV44. Performance Feedback              | Q46. My supervisor provides me with constructive suggestions to improve my job performance.                                                                                                                                                         |
| IV45. Employee Development              | Q47. Supervisors in my work unit support employee development.                                                                                                                                                                                      |
| IV46. Supervisory Support               | Q48. My supervisor listens to what I have to say.                                                                                                                                                                                                   |
| IV47. Trust in Supervisor               | Q49. My supervisor treats me with respect.                                                                                                                                                                                                          |

---

---

|                                           |                                                                                                                        |
|-------------------------------------------|------------------------------------------------------------------------------------------------------------------------|
| IV48. Performance Feedback                | Q50. In the last six months, my supervisor has talked with me about my performance.                                    |
| IV49. Trust in Supervisor                 | Q51. I have trust and confidence in my supervisor.                                                                     |
| IV50. Work-unit Performance               | Q52. Overall, how good a job do you feel is being done by your immediate supervisor?                                   |
| IV51. Senior Leadership                   | Q53. In my organization, senior leaders generate high levels of motivation and commitment in the workforce.            |
| IV52. Trust in Supervisor                 | Q54. My organization's senior leaders maintain high standards of honesty and integrity.                                |
| IV53. Diversity Management                | Q55. Supervisors work well with employees of different backgrounds.                                                    |
| IV54. Task-oriented Leadership            | Q56. Managers communicate the goals of the organization.                                                               |
| IV55. Task-oriented Leadership            | Q57. Managers review and evaluate the organization's progress toward meeting its goals and objectives.                 |
| IV56. Management Communication            | Q58. Managers promote communication among different work units (for example, about projects, goals, needed resources). |
| IV57. Task-oriented Leadership            | Q59. Managers support collaboration across work units to accomplish work objectives.                                   |
| IV58. Satisfaction with Senior Leadership | Q60. Overall, how good a job do you feel is being done by the manager directly above your immediate supervisor?        |
| IV59. Trust in Supervisor                 | Q61. I have a high level of respect for my organization's senior leaders.                                              |
| IV60. Work/Life Balance                   | Q62. Senior leaders demonstrate support for Work/Life programs.                                                        |
| IV61. Organizational Procedural Justice   | Q63. How satisfied are you with your involvement in decisions that affect your work?                                   |
| IV62. Job Satisfaction                    | Q64. How satisfied are you with the information you receive from management on what's going on in your organization?   |
| IV63. Job Satisfaction                    | Q65. How satisfied are you with the recognition you receive for doing a good job?                                      |

---

|                                           |                                                                                            |
|-------------------------------------------|--------------------------------------------------------------------------------------------|
| IV64. Satisfaction with Senior Leadership | Q66. How satisfied are you with the policies and practices of your senior leaders?         |
| IV65. Job Satisfaction                    | Q67. How satisfied are you with your opportunity to get a better job in your organization? |
| IV66. Employee Development                | Q68. How satisfied are you with the training you receive for your present job?             |
| IV67. Job Satisfaction                    | Q69. Considering everything, how satisfied are you with your job?                          |
| IV68. Pay Satisfaction                    | Q70. Considering everything, how satisfied are you with your pay?                          |
| IV69. Organizational Satisfaction         | Q71. Considering everything, how satisfied are you with your organization?                 |

---

Note. Responses of IV1-IV27, IV29-IV49, and IV51-IV60 are 5-likert scale (1 = Strongly Disagree, 2 = Disagree, 3 = Neither Agree nor Disagree, 4 = Agree, 5 = Strongly agree). Responses of IV28, IV50, and IV58 are 5-likert scale (1 = Very Poor, 2 = Poor, 3 = Fair, 4 = Good, 5 = Very Good). Responses of IV61-IV69 are 5-likert scale (1 = Very Dissatisfied, 2 = Dissatisfied, 3 = Neither Satisfied nor Dissatisfied, 4 = Satisfied, 5 = Very Satisfied). Q41 (I believe the results of this survey will be used to make my agency a better place to work) is removed in the analysis.
